# Supplementary material for: Liver diseases: epidemiology, causes, trends and predictions
Source: Springer Nature journal article supplement (doi:10.1038/s41392-024-02072-z), 2025-02-04
Supplement: MOESM1 [file 41392_2024_2072_MOESM1_ESM.pdf]

20240930140919103813257768300953

17

## 1 Inter-cellular mechanisms

2 Cellular crosstalk is a crucial event that maintains liver homeostasis. When liver injury occurs,  
3 hepatocytes and non-parenchymal cells engage in pathological paracrine interactions. In this  
4 section, we describe the cellular crosstalk during liver diseases.

5

## 6 Hepatocytes

7 Hepatocytes, <sup>14</sup>major parenchymal cells in the liver, perform diverse <sup>14</sup>roles in lipid and glucose  
8 <sup>14</sup>metabolism, detoxification and protein synthesis. During disease states, <sup>14</sup>hepatocytes face direct  
9 assaults from viruses or metabolites but also respond to signals from neighboring cells. The  
10 injury imposed on hepatocytes may exacerbate cellular dysfunction and subsequent death.<sup>318</sup>  
11 Liver macrophages serve as primary reservoirs for <sup>5</sup>inflammatory cytokines such as IL-1 $\beta$  and  
12 <sup>5</sup>TNF- $\alpha$ , which contribute to hepatocyte death.<sup>319</sup> It has been well-established that IL-1 drives  
13 hepatocyte inflammation and apoptosis via interacting with its receptor and downstream  
14 effectors. In contrast, hepatocyte-specific depletion of IL-1 receptor rescues hepatocyte  
15 apoptosis by blocking JNK/NF- $\kappa$ B signaling during acute liver injury.<sup>320</sup> Inflammasomes  
16 released from macrophages also contribute to hepatocyte pyroptosis and liver inflammation in  
17 mouse model of MASLD.<sup>320</sup> In addition, Wnt2 protein derived from LSECs was found to  
18 regulate cholesterol and bile acid homeostasis in hepatocytes.<sup>321</sup> However, silencing the  
19 expression of LSEC-specific Wnt2 disturbs hepatocyte metabolic profiles in both acute and  
20 chronic liver injury, indicating the essential role of LSECs in hepatocyte function.<sup>322</sup>

21

## 22 Cholangiocytes

23 Cholangiocytes are highly specialized epithelial cells forming the bile ducts and are essential  
24 for bile acid homeostasis. In chronic liver injury, such as cholangiopathies, a pathological  
25 feature known as a ductular reaction occurs, characterized by the proliferation of reactive  
26 ductular cells.<sup>323</sup> Ablation of  $\beta$ 1-integrin in hepatocytes stimulates the ductular reaction, leading  
27 to cholangiocyte-derived hepatocyte regeneration during chronic liver diseases. These data  
28 indicate the potential network between hepatocytes and cholangiocytes.<sup>324</sup> Inflammatory and  
29 fibrotic secretions from immune cells are involved in cholangiocyte activation and biliary repair,  
30 which in turn, leads to increased inflammatory cell infiltration and persistent liver

31 impairment.<sup>325,326</sup>

32

33 LSECs

34 LSECs are highly differentiated endothelial cells lining the liver sinusoids. LSECs possess a  
35 unique phenotype with fenestrae, enabling substantial exchanges and cellular  
36 communications.<sup>327</sup> Although LSECs detect extrahepatic signals and help maintain liver  
37 homeostasis through angiocrine mechanisms, their function and architecture are regulated by  
38 other cell types. Inflammatory cell populations, such as CCR2<sup>+</sup> macrophages and CXCR1<sup>+</sup>  
39 neutrophils, which are recruited by injured LSECs in the early phase of liver damage, could in  
40 turn compromise LSEC endocytosis capacity and cause its fenestrae impairments.<sup>328,329</sup>  
41 Moreover, neutrophil adhesion attracts platelet recruitment, leading to the generation of  
42 sinusoidal microthrombi, which in turn induces sinusoidal dysfunction and vasoconstriction.<sup>330</sup>  
43 This pathological cascade elevates sinusoidal pressure, exacerbating liver fibrosis and portal  
44 hypertension. HSCs are crucial players to maintain LSEC phenotype. Bone morphogenetic  
45 protein 9 (BMP-9) has been identified to control vessel homeostasis.<sup>331</sup> Intriguingly, HSCs are  
46 the hepatic cell source of BMP-9, which emphasize the impact of HSC-derived BMP-9 on  
47 LSEC phenotype and function via targeting its receptor activin receptor-like kinase 1 (ALK-  
48 1).<sup>332</sup> Aberrant expression of BMP-9 or ALK-1 depletion in LSECs during diseased states  
49 results in impaired angiocrine function and LSEC architecture, underlining the effect of HSCs  
50 on LSEC physiological process.<sup>333</sup>

51

52 HSCs

53 Quiescent hepatic stellate cells (qHSCs) represent about 5% of liver resident cells and reside in  
54 the space of Disse. Following liver damage, qHSCs convert to an activated myofibroblast  
55 phenotype characterized by proliferation, contractility, and chemotaxis.<sup>334</sup> Fate tracing analysis  
56 has implicated that activated HSCs are the predominant source of ECM in liver diseases  
57 induced by toxic, fatty and cholestatic insults.<sup>335,336</sup> These activated HSCs migrate to the injured  
58 sites, where they proliferate and contribute to ECM production, thus participating in liver repair.  
59 Multiple mediators from other liver cell types contribute to HSCs activation. LSECs are  
60 responsible for the production of TGF- $\beta$  and activation of HSC via the angiocrine pathway

61 during the early stage of liver injury.<sup>337,338</sup> Besides canonical TGF- $\beta$  signaling, platelet-derived  
 62 growth factor (PDGF) and IL-6 produced by capillarized LSECs also contribute to HSC  
 63 activation by the JAK/STAT pathway.<sup>339</sup> Notably, macrophages are the major producers of  
 64 TGF- $\beta$ , leading to subsequent HSC activation during liver injury. Loss of TGF- $\beta$  results in a  
 65 significant decrease in ECM deposition.<sup>340</sup> NLRP3 inflammasome, induced by pyroptotic  
 66 hepatocytes, also activates HSCs by releasing multiple cytokines in CCl<sub>4</sub>-induced liver  
 67 injury.<sup>341</sup> In summary, various liver cell types are responsible for HSC activation to induce liver  
 68 fibrosis.

## 70 Macrophages

71 As the predominant immune cell type in the liver, macrophages play crucial roles in maintaining  
 72 liver homeostasis and responding to diseases. Hepatic macrophages are composed by liver-  
 73 resident Kupffer cells (KCs) and monocyte-derived macrophages (MoMFs), two heterogeneous  
 74 subpopulations with distinct functions.<sup>342</sup> KCs primarily serve as the main source of hepatic  
 75 macrophages in a healthy liver, responsible for sensing injury signals and clearing cellular  
 76 debris.<sup>343</sup> Under inflammatory conditions, MoMFs infiltrate and become the major component  
 77 of hepatic macrophages with the loss of KCs.<sup>344</sup> Macrophages play essential roles in liver  
 78 inflammation and fibrosis via the production of inflammatory cytokines and chemokines and  
 79 the activation of inflammasomes.<sup>345</sup> LSECs recruit MoMFs in a CCL2/CCR2-dependent  
 80 manner during chronic liver injury. Specifically, by deleting LSEC-specific CCL2, infiltrating  
 81 macrophage recruitment, liver inflammation, and fibrosis were reduced in CCl<sub>4</sub>-induced  
 82 mice.<sup>328</sup> In addition, transcriptome analysis and animal experiments reveal that hepatocytes are  
 83 involved in the recruitment of MoMFs via the CCL2-CCR2 interaction in acute liver injury to  
 84 facilitate necrotic lesion resolution.<sup>346,347</sup> Besides, mediators secreted by hepatocytes, such as  
 85 IL-17, IL-1 $\beta$  and extracellular vesicles (EVs), mediate inflammatory macrophage infiltration  
 86 and the development of ALD and MASLD.<sup>348,349</sup> However, certain inflammatory macrophages  
 87 switch to an anti-inflammatory LY6C<sup>low</sup> phenotype during the progression of liver diseases,  
 88 which plays an important role in ECM degradation via secretion of MMPs.<sup>350</sup> Moreover,  
 89 targeting myeloid-derived RNF-41 has been shown to promote this phenotypic switch and  
 90 subsequent ECM degradation, thus leading to fibrosis resolution.<sup>351</sup> While the data indicate the

dual roles of macrophages, further investigations are needed to elucidate the precise mechanisms of macrophage phenotype switch during liver inflammation and fibrosis.

#### Other immune cells

The T cell-mediated adaptive immune response plays central roles in antigen-driven liver diseases such as autoimmune hepatitis and chronic viral hepatitis.<sup>352</sup> Autoantigens in hepatocytes, such as formiminotransferase cyclodeaminase, and cytochrome P450 2D6, are presented in the <sup>22</sup>naïve CD4<sup>+</sup> T-helper lymphocytes. These Th0 <sup>13</sup>cells subsequently differentiate into Th1 and Th2 cells, which are responsible for macrophage and B cell infiltration, respectively. This immune response cascade attacks hepatocytes, contributing to liver injury.<sup>353,354</sup> Similarly, the T cell response is also pivotal in the clearance of HBV and HCV. Effector T cells recognize HBV/HCV-infected hepatocytes and eliminate the virus through a combination of cytotoxic and non-cytotoxic pathways.<sup>355,356</sup>

In a healthy liver, neutrophils are typically absent, but their infiltration within liver sinusoids is noted during acute and chronic liver diseases.<sup>357</sup> Research has highlighted that LSEC-dependent neutrophils infiltration occurs through the secretion of CXCL chemokines.<sup>358</sup> Growing evidence has emphasized the significance of neutrophil in liver diseases, as they are thought to promote liver inflammation by releasing cytokines and chemokines, along with recruiting various other immune cells and potentially contributing to the formation of microthrombi.<sup>359,360</sup> Collectively, these findings indicate that immune cells play multifaceted roles in the progression of liver diseases, impacting both the immune response and inflammatory processes within the liver.

#### Liver-organ communication

Emerging evidence has shown that pathological changes at the molecular and cellular levels may not fully account for the pathogenesis of liver diseases, implying a potential role for inter-organ communications in their development. Recently, the gut-liver-brain and adipose-liver homeostasis has gained much attention.<sup>361</sup> In this section, we summarize the recent research on the importance of liver-organ interactions concerning metabolism, immune system, and nervous system.

121

122 Gut-liver-brain axis

123 Numerous preclinical and clinical studies have highlighted <sup>10</sup> the role of abnormal gut  
124 microbiota and their metabolites in impairing intestinal barrier function, further contributing to  
125 liver diseases. Increased permeability is reported <sup>10</sup> in mice fed a high-fat diet or with excessive  
126 ethanol intake.<sup>362,363</sup> Gut leakage leads to the delivery of pathogens and their metabolites to the  
127 liver via portal vein. In patients with MASH, gut microbiomes predominantly exhibit Gram-  
128 positive *Firmicutes*. However, there is <sup>2</sup> a decrease in *Firmicutes* and an increase in Gram-  
129 negative *Proteobacteria* abundance as liver fibrosis develops.<sup>364</sup> Animal studies demonstrate  
130 <sup>4</sup> that germ-free mice fed a high-fat diet show reduced liver steatosis and insulin resistance  
131 <sup>10</sup> compared to wild-type mice on the same diet.<sup>365</sup> This beneficial effect disappears following  
132 fecal microbiota transplantation (FMT) from MASLD mice to germ-free mice, resulting in  
133 increased liver triglyceride content and inflammation.<sup>366</sup> These data indicate that dysregulated  
134 gut microbiota is essential for the progression of MASLD. Besides pathogenic bacteria, their  
135 metabolites also mediate liver diseases. For instance, <sup>18</sup> short chain fatty acids (SCFAs) produced  
136 by gut bacteria have been linked to promoting hepatic *de novo* lipogenesis and glucose  
137 production, exacerbating the development of MASLD and ALD in mouse models.<sup>367,368</sup> In  
138 contrast, acetate, another type of SCFA, could block the IL-6/JAK1/STAT3 signaling pathway  
139 via binding to hepatocyte-derived GPR43, and reverse the development of MASLD-associated  
140 hepatocellular carcinoma.<sup>369</sup> This suggests the complex functions of SCFA components on liver  
141 injury. In addition, gut bacteria-derived lipopolysaccharides (LPS) influxes to the liver and  
142 activates Kupffer cells or macrophages expressing toll-like receptors (TLRs). These immune  
143 cells produce inflammatory cytokines and chemokines, thus augmenting innate immune  
144 responses and liver injuries.<sup>370,371</sup> On the other hand, the normal enterohepatic circulation of  
145 bile acids (BAs) is important for liver and intestinal homeostasis. BA is secreted by hepatocytes  
146 and modified in the intestine for lipid digestion and absorption. Upon liver injury, changes in  
147 BA composition and level, as well as decreased BA receptor (farnesoid X receptor; FXR) was  
148 reported.<sup>372</sup> Studies show that a decrease in intestinal FXR levels dampens the tight junctions  
149 of intestinal epithelial cells and promotes intestinal lipid absorption.<sup>373,374</sup> Additionally,  
150 knockdown of hepatocyte-derived FXR increases hepatic triglyceride content. In contrast,

151 activation or overexpression of FXR protects against liver injury by decreasing hepatic  
152 lipogenic gene expression, reducing intestinal lipid absorption, and promoting intestinal barrier  
153 integrity.<sup>374,375</sup>

8  
154 The liver-brain axis is essential in the context of liver diseases. Upon acute or chronic injury,  
155 liver produces inflammatory cytokines and is unable to process ammonia from the  
156 intestine.<sup>376,377</sup> These cytokines, such as TNF- $\alpha$  and IL-1 $\beta$ , impair blood-brain barrier (BBB)  
157 function and structure, and lead to neuroinflammation.<sup>378</sup> In addition, lipid components such as  
158 ceramide and palmitate, along with peripheral insulin resistance in MASLD preclinical models,  
159 contribute to neuroinflammation and neurodegeneration.<sup>379</sup> Moreover, ammonia crosses the  
160 damaged BBB and is absorbed by astrocytes, leading to the conversion of ammonia to  
161 glutamine and subsequently causing cerebral edema and neuronal cell death.<sup>380</sup> Reciprocally,  
162 the central nervous system (CNS) exerts an influence on liver and intestine function. Changes  
163 in liver microenvironment are detected and transduced through hepatic vagal sensory afferent  
164 nerves to CNS, which feeds back the signal to liver vagal parasympathetic nerves.<sup>381</sup> For  
165 instance, CNS leptin signaling has been shown to promote hepatic triglyceride export and  
166 inhibit lipogenesis via the brain-vagus-liver axis, thereby attenuating the development of  
167 MASLD in animal models, as well as in a randomized, placebo-controlled crossover trial.<sup>382,383</sup>  
168 Chronic systemic inflammation involving liver-organ interactions, as well as bacteria  
169 translocation due to impaired intestinal barrier can further lead to acute-on-chronic liver injury  
170 and multiorgan failure.<sup>384</sup> In summary, dysregulation of the gut-liver-brain axis partially  
171 influence the progression of liver diseases, suggesting potential therapeutic strategies targeting  
172 this axis for liver disease management.

173

#### 174 Adipose-liver axis

175 Emerging studies have demonstrated the pathological crosstalk between the liver and adipose  
176 tissue during liver diseases, especially MASLD and ALD. Fat overload leads to adipocyte  
177 hypertrophy, hyperplasia, and abnormal adipokine production.<sup>385</sup> Chronic ethanol exposure also  
178 disrupts the endocrine function of adipose tissue.<sup>386</sup> For example, adiponectin, which promotes  
179 liver glucose use and fatty acid oxidation, is found to be decreased in MASLD and ALD;  
180 however, exogenous supplementation of adiponectin alleviates high-fat diet- and ethanol-



181 induced liver steatosis and insulin resistance.<sup>387</sup> Leptin, an adipocyte-derived hormone that  
182 inhibits appetite and increases fatty acid oxidation, becomes resistant in MASLD. In obese  
183 individuals, higher <sup>5</sup> serum leptin levels correlate with greater severity of liver inflammation.<sup>388</sup>  
184 In contrast, <sup>26</sup> inflammatory cytokines such as IL-1 $\beta$  and TNF- $\alpha$  are produced by these diseased  
185 adipocytes. The inflammatory microenvironment recruits immune cell infiltration and further  
186 promotes adipocyte lipolysis. Systemic release of fatty acids and cytokines flows into the liver  
187 and aggravates liver steatosis and inflammation.<sup>389</sup>

188 Conversely, the liver also interacts with adipose tissue. <sup>11</sup> Fibroblast growth factor-21 (FGF-  
189 21), an endocrine hormone mainly produced by hepatocytes, contributes to glucose uptake and  
190 adiponectin production in adipocytes.<sup>390</sup> In obesity, the expression of FGF-21 increases with  
191 the progression of MASH, whereas its effect on adipose tissue becomes resistant, as evidenced  
192 by decreased levels of adiponectin.<sup>391</sup> As mentioned above, a decrease in adiponectin  
193 exacerbates the development of MASLD and ALD by promoting liver steatosis and insulin  
194 resistance. In summary, pathological crosstalk <sup>5</sup> between the liver and adipose tissue contributes  
195 to liver diseases.

## 197 **Diagnosis, staging, prevention and therapeutic strategies**

198 The diagnosis of liver disease usually includes the following steps: history collection, physical  
199 examination, laboratory tests, imaging examination, and histopathological examination. For  
200 several kinds of liver diseases, a liver biopsy may be required to confirm the diagnosis by  
201 pathological examination under a microscope. In the process of diagnosis, it is necessary to  
202 select targeted examination items according to the specific conditions of the patient to clarify  
203 or exclude the disease (Table 2). The accurate diagnosis of etiology and clinical staging is  
204 crucial for guiding treatment strategies and improving patient prognosis. Therefore, we have  
205 summarized the current diagnostic principles and staging plans for various liver diseases, while  
206 also providing an introduction to the corresponding treatment strategies as outlined in the  
207 guidelines.

208 The treatment approach for liver disease is comprehensive, encompassing etiological  
209 management, lifestyle modifications, pharmacotherapy, nutritional support, prevention and  
210 management of complications, regular monitoring, and health education. Irrespective of the



211 underlying cause, liver transplantation may represent the sole efficacious intervention for  
212 advanced liver disease following cirrhosis or hepatic failure.

213

#### 214 Viral hepatitis

215 Due to the presence of multiple types of hepatitis viruses and the possibility of acute or chronic  
216 viral infections in patients, serological testing is necessary following a thorough history  
217 collection and physical examination.<sup>392</sup> Hepatitis virus antigen and corresponding antibody tests,  
218 along with etiological tests such as viral RNA load assessments, serve as crucial diagnostic  
219 indicators for identifying viral hepatitis in individuals presenting related symptoms.<sup>393,394</sup> The  
220 diagnosis of viral hepatitis can be established by considering the patient's clinical  
221 manifestations, evidence of liver function impairment in laboratory tests, and results from  
222 auxiliary imaging examinations while excluding other potential diseases that may present  
223 similar symptoms.

224 Vaccination is the most effective means of preventing infection with hepatitis A, B, and D  
225 viruses.<sup>395</sup> The recombinant HBV vaccine is both safe and highly efficacious, capable of being  
226 administered as a standalone immunization or in conjunction with other antigens utilized in  
227 infant immunization programs or alongside the hepatitis A virus vaccine. The treatment  
228 approach for viral hepatitis should be tailored to each individual patient's condition, including  
229 factors such as virus type, liver function status, presence of complications, and other relevant  
230 considerations. For patients afflicted by chronic or severe forms of hepatitis, antiviral therapy  
231 may be considered to impede progression towards cirrhosis, liver failure, and hepatocellular  
232 carcinoma. Antiviral agents like lamivudine, entecavir, and tenofovir can be employed for  
233 treating CHB while DAAs such as sofosbuvir and harvoni can be used against hepatitis C  
234 infections.<sup>396,397</sup> Currently, nucleos(t)ide analogues have demonstrated safety along with  
235 efficacy in inhibiting HBV replication; however, they rarely achieve clearance of HBsAg  
236 necessitating long-term administration to prevent recurrence. Therefore, various classes of  
237 DAAs and immunomodulatory therapies are currently under development aiming at achieving  
238 functional cure defined as persistent undetectable HBsAg levels along with absence of  
239 detectable HBV DNA after completion of limited duration treatment.<sup>398,399</sup> It might eventually  
240 require combination therapy involving multiple drug classes to attain this objective. Detailed

241 information of viral hepatitis managements can be found in updated AASLD and EASL clinical  
242 practice guidelines.<sup>393,394,396,400-402</sup>

243

244 Acute liver injury

245 Ancillary examinations revealed deranged liver function tests further supporting the initial  
246 diagnosis of acute liver injury (ALI).<sup>403</sup> Thorough medical history collection can aid in  
247 identifying potential risk factors for ALI, such as recent initiation of medications or  
248 herbal/nutritional supplements intake, exposure to possible pathogens, travel history, and  
249 vaccination status.<sup>404</sup> The definition of mild acute liver injury typically includes an ALT level  
250 between 2 and 5 times the upper limit of normal (ULN). Moderate ALI is usually defined as an  
251 ALT level between 5 times and 15 times the ULN. Severe ALI requires meeting specific criteria,  
252 including an international normalized ratio (INR) of  $\geq 2.0$ , ALT levels of  $\geq 10$  ULN, and total  
253 bilirubin (TbIL) levels of  $\geq 3.0$  mg/dL without hepatic encephalopathy.<sup>405</sup> An increase in the  
254 INR indicates a poor prognosis for patients with severe ALI.<sup>406</sup> Studies have demonstrated that  
255 apart from etiology, bilirubin levels, INR values, and duration of jaundice are effective  
256 predictors for poor prognosis in ALI patients with specific thresholds such as duration of  
257 jaundice  $>3$  days, TbIL  $>51$   $\mu\text{mol/L}$ , and INR  $>1.7$ .<sup>407</sup>

258 The fundamental principles of ALI treatment encompass early identification and correction  
259 of reversible causes, judicious selection of medications, timely implementation of liver  
260 replacement therapy, and proactive prevention and management of complications.<sup>408</sup> Patients  
261 with abnormal liver function who do not yet meet the criteria for ALI should be closely  
262 monitored to promptly remove pathogenic factors in order to prevent liver damage or failure.<sup>409</sup>  
263 For patients with rapid disease progression or existing liver damage, drug therapy should be  
264 considered based on active monitoring and etiological treatment. Currently available  
265 hepatoprotective drugs can generally be categorized into agents that repair and protect the liver  
266 cell membrane, anti-inflammatory drugs, antioxidant drugs (e.g. NAC and glutathione), and  
267 cholestrogenic drugs (e.g. UDCA).<sup>410,411</sup> Presently, there is a lack of specific medications and  
268 approaches for treating advanced ALF. Thus, emphasis should be placed on symptomatic  
269 treatment while actively preventing complications. The use of adrenocortical hormones in the  
270 management of liver failure remains controversial; comprehensive consideration must be given

271 to etiology and patient monitoring indices before making a decision.<sup>412,413</sup> Cytokine therapies  
272 are under investigation. For example, An open-label, dose-escalation study utilizing IL-22  
273 agonist F-652 to treat sAH has yielded promising results as anticipated, thereby offering a  
274 potential effective treatment strategy for further reducing the case fatality rate.<sup>414,415</sup> Guidelines  
275 related to artificial livers and liver transplantation can serve as references for their respective  
276 treatments.<sup>416,417</sup> Detailed information of acute liver failure and acute-on-chronic liver failure  
277 managements can be found in updated AASLD and EASL clinical practice guidelines (Fig.  
278 6).<sup>418-420</sup>

279

## 280 MASLD

281 <sup>33</sup> The diagnosis of MASLD is based on three criteria: (1) imaging diagnosis of hepatic steatosis  
282 and/or liver biopsy findings of  $\geq 5\%$  hepatocyte ballooning degeneration; (2) presence of one  
283 or more metabolic syndrome score components; (3) exclusion of other causes that may  
284 contribute to hepatic steatosis.<sup>421</sup> Ultrasound imaging is the preferred modality for diagnosing  
285 hepatic steatosis and monitoring hepatocellular carcinoma.<sup>422</sup> Liver stiffness measurement  
286 obtained through shear wave elastography can be utilized for non-invasive assessment of  
287 hepatic steatosis and fibrosis in patients with chronic liver disease. In addition to meeting the  
288 diagnostic criteria for MASLD, the presence of  $\geq 5\%$  hepatocyte ballooning degeneration  
289 combined with lobular inflammation and/or portal inflammation can lead to a diagnosis of  
290 MASH. Given the associated risks, a liver biopsy is typically reserved for cases where MASH  
291 is suspected but cannot be confirmed by other means. Currently, clinicians make comprehensive  
292 judgments based on individual patient circumstances to select appropriate diagnostic  
293 methods.<sup>423</sup>

294 The management of MASLD necessitates a multidisciplinary approach, encompassing  
295 strategies such as weight and waist circumference reduction, enhancement of insulin sensitivity,  
296 prevention of metabolic syndrome and T2DM, mitigation of MASH, and reversal of fibrosis.  
297 Dietary modification and increased physical activity through health education serve as the  
298 fundamental pillars in the treatment regimen for MASLD. Greater weight loss in  
299 overweight/obese individuals confers additional benefits on metabolic cardiovascular health  
300 and liver function. A gradual weight reduction ranging from 3% to 5% within one year can

301 reverse hepatic steatosis; a weight loss between 7% to 10% can alleviate MASH; more than 10%  
302 weight loss can lead to fibrosis regression; while a substantial decrease by 15% even improves  
303 T2DM symptoms.<sup>424</sup> Unhealthy habits such as irregular eating patterns, soft drink consumption,  
304 smoking tobacco products, or alcohol use should be avoided alongside sedentary behavior and  
305 physical inactivity.<sup>425</sup>

306 Combined presence of metabolic cardiovascular risk factors and liver injury necessitates  
307 appropriate pharmacological intervention. Patients with MASLD and a BMI  $\geq 28$  kg/m<sup>2</sup> may  
308 benefit from weight loss medications, while hypoglycemic drugs for weight reduction should  
309 be prioritized in the treatment of type 2 diabetes.<sup>421,426</sup> In managing diabetic patients with  
310 MASLD, preference should be given to drugs such as metformin, pioglitazone, SGLT-2  
311 inhibitors, GLP-1 receptor agonists, and other agents that have potential hepatoprotective  
312 effects.<sup>427</sup> Statins are the primary choice for pharmacotherapy of arteriosclerotic lipid disorders  
313 in MASLD patients; however, caution or discontinuation is advised when using statins in  
314 individuals with severe liver diseases like decompensated cirrhosis.<sup>428</sup> ACE inhibitors or ARBs  
315 are recommended as first-line therapy for hypertension in MASLD patients, whereas non-  
316 selective  $\beta$ -blockers can be used concomitantly if clinically significant portal hypertension is  
317 present.<sup>429</sup> As an agonist of the thyroid hormone receptor- $\beta$  (THR- $\beta$ ), resmetirom has recently  
318 gained FDA approval for the treatment of adult patients with MASH and liver fibrosis.<sup>430</sup> For  
319 non-cirrhotic MASLD patients who meet the criteria for metabolic surgery aimed at weight loss,  
320 options such as gastric bypass surgery, sleeve gastrectomy, duodenal transposition, or  
321 adjustable gastric banding may be considered to address MASH and fibrosis.<sup>431</sup> Liver  
322 transplantation could be an option for individuals with decompensated cirrhosis resulting from  
323 MASH complications or ACLF as well as those diagnosed with HCC.<sup>432</sup> Detailed information  
324 of MASLD managements can be found in updated AASLD and EASL clinical practice  
325 guidelines (Fig. 7).<sup>421,433</sup>

## 327 ALD

328 Alcohol-related liver disease is diagnosed in patients who typically have a prolonged history of  
329 alcohol consumption (more than 12 months,  $>2$  drinks in women and  $>3$  drinks in men per day)  
330 or recent heavy alcohol use within the past two weeks. The patient's clinical symptoms were

331 nonspecific and accompanied by abnormal serum liver function tests. Notably, an elevated  
332 AST/ALT ratio ( $>1.5$ ), GGT levels, and mean corpuscular volume (MCV) values are  
333 characteristic of ALD.<sup>434</sup> These indicators can significantly decrease after cessation of alcohol  
334 intake and usually return to normal within four weeks (although GGT may take longer to  
335 normalize), which aids in diagnosis.<sup>435</sup> Imaging studies are used for diagnosis while excluding  
336 hepatitis viruses, medications, toxic liver injury, autoimmune liver disease, and other  
337 conditions.<sup>436</sup> Symptomatic alcoholic hepatitis is diagnosed in the presence of jaundice and the  
338 criteria proposed by the National Institute on Alcohol Abuse and Alcoholism: last alcoholic  
339 drink within 8 weeks of onset of jaundice; serum bilirubin level greater than 3 mg/dL; AST and  
340 alanine aminotransferase level less than 400 IU/L and AST level greater than 50 IU/mL, with  
341 the ratio of AST to alanine aminotransferase greater than 1.5:1; and other causes of liver disease,  
342 biliary obstruction, and hepatocellular carcinoma ruled out.<sup>437</sup>

343 The treatment principles of ALD include abstinence and nutritional support, reducing the  
344 severity of the disease, and providing symptomatic treatment for alcoholic cirrhosis and its  
345 complications.<sup>438</sup> Complete abstinence from alcohol enhances prognosis, mitigates liver  
346 histological injury, decreases portal vein pressure, delays fibrosis progression, and improves  
347 survival at all stages of the disease. Baclofen may be administered orally to individuals facing  
348 challenges with active abstinence.<sup>434</sup> Moreover, patients with ALD require adequate nutritional  
349 support, including a high-protein, low-fat diet based on alcohol abstinence. Additionally,  
350 attention should be given to vitamin supplementation.<sup>439</sup> Due to the limited expression of IL-  
351 22 receptor on epithelial cells, such as hepatocytes, IL-22 could serve as a specific target for  
352 preventing hepatocyte death and promoting hepatocyte proliferation without affecting immune  
353 cells. A multicenter trial is currently underway to investigate the use of IL-22Fc in treating  
354 ACLF, including severe alcoholic hepatitis (sAH) (CTR20212657).<sup>415</sup> Inflammation has been  
355 extensively studied as a therapeutic target for sAH treatment due to its significant role in the  
356 pathogenesis of alcoholic liver disease. Steroid therapy has been utilized since the 1970s and  
357 emerging data suggest that it improves short-term survival in some sAH patients without  
358 impacting long-term survival.<sup>435</sup> Treatment for anti-hepatic fibrosis should be prioritized along  
359 with actively addressing complications related to alcoholic cirrhosis such as esophageal and  
360 gastric varices rupture bleeding, spontaneous bacterial peritonitis, hepatic encephalopathy, and

361 hepatocellular carcinoma.<sup>440</sup> <sup>1</sup> Liver transplantation may be considered for patients with severe  
362 alcoholic cirrhosis; however, many transplant centers require patients to abstain from alcohol  
363 for six months before undergoing surgery.<sup>441</sup> Detailed information of ALD managements can  
364 be found in updated AASLD and EASL clinical practice guidelines (Fig. 7).<sup>439,442</sup>

365

366 AIH

367 Patients with AIH often exhibit mild to moderate elevation of ALT and AST. On the other hand,  
368 patients with PBC and PSC frequently present elevated serum ALP and GGT levels, along with  
369 increased bilirubin levels in advanced stages.<sup>134</sup> Serum <sup>12</sup> autoantibodies such as anti-nuclear  
370 antibody (ANA) and anti-smooth muscle antibody (ASMA) can be detected in AIH patients,  
371 accompanied by elevated IgG levels.<sup>443</sup> In 90-95% of PBC patients, serum antibodies against  
372 mitochondria (AMA) and elevated IgM levels can be found.<sup>444</sup> <sup>19</sup> Ultrasound, CT scan, MRI,  
373 endoscopic retrograde cholangiopancreatography (ERCP), and magnetic resonance  
374 cholangiopancreatography (MRCP) can be utilized to exclude biliary diseases like tumors or  
375 stones affecting the hepatobiliary system.<sup>136</sup> ERCP is considered the "gold standard" for  
376 diagnosing PSC; however, MRCP is preferred due to its non-invasive nature when diagnosing  
377 this condition initially.<sup>445,446</sup> Liver histological biopsy serves as a means to differentiate between  
378 causes of liver injury and evaluate tissue damage.<sup>447</sup> Liver histological biopsy serves as a means  
379 to differentiate between causes of liver injury and evaluate tissue damage.<sup>447</sup> The Paris  
380 diagnostic criteria and the AIH simplified diagnostic system are widely utilized for diagnosing  
381 AIH and its overlap with PBC. Among these, the Paris criteria stand out as the most common  
382 and effective tool for diagnosing AIH-PBC overlap syndrome.<sup>448</sup> <sup>24</sup> In 2008, the International  
383 Autoimmune Hepatitis Group introduced a simplified diagnostic scoring system for AIH, which  
384 proves valuable in identifying patients with AIH-PBC requiring corticosteroid treatment.<sup>449</sup>

385 The treatment and prognosis of different autoimmune liver diseases vary significantly.  
386 Immunosuppressive therapy is the primary approach for managing AIH, with a combination of  
387 prednisolone and azathioprine being the preferred treatment for AIH patients.<sup>450</sup> In cases of  
388 poor response, alternative immunosuppressive agents can be considered. UDCA is the first-line  
389 option for PBC treatment, while additional medications such as bile salts, budesonide, and  
390 obeticholic acid may be added if necessary.<sup>451</sup> Currently, there are no drugs available to alleviate



391 liver damage caused by PSC. Therefore, the focus lies in controlling complications and  
392 monitoring liver damage. UDCA can improve liver biochemical markers, reduce liver fibrosis  
393 severity, and enhance imaging findings related to biliary tract involvement.<sup>452</sup> Glucocorticoids  
394 are favored for inducing remission in IGG4-associated hepatobiliary diseases.<sup>453</sup> Patients who  
395 seek early treatment for AIH generally exhibit better treatment responses and prognoses  
396 comparable to those of healthy individuals in the long term. Conversely, patients who delay  
397 seeking treatment or do not respond well to therapy have an increased risk of developing  
398 cirrhosis and liver failure. <sup>2</sup> Liver transplantation remains the sole effective intervention for end-  
399 stage liver disease.<sup>454</sup> Detailed information of AIH managements can be found in updated  
400 AASLD and EASL clinical practice guidelines.<sup>454,455</sup>

401

#### 402 Genetic and rare liver diseases

403 Inherited liver diseases exhibit overlapping clinical manifestations, often requiring multiple  
404 clinical or pathological features for diagnosis.<sup>100</sup> Genetic testing is the most crucial tool in  
405 diagnosing hereditary liver diseases. However, due to the complexity and diversity of genetic  
406 mutations in genetic liver disease, gene analysis and diagnosis remain challenging due to factors  
407 such as high cost, poor detection sensitivity, and the close relationship between heredity and  
408 acquired environment.<sup>456</sup> Some rare or inherited liver diseases have unique clinical  
409 manifestations that aid in their diagnosis; for example, <sup>7</sup> the combination of Kayser-Fleischer  
410 rings and a low serum ceruloplasmin (<0.1 g/L) level are prominent features of Wilson's disease  
411 while decreased serum  $\alpha$ 1-antitrypsin levels with pulmonary damage such as emphysema  
412 suggest  $\alpha$ 1 antitrypsin deficiency.<sup>193</sup> Notably, these features are not always reliable, and  
413 additional tests, such as high-quality imaging tests (e.g., MRI) or liver tissue biopsies, can also  
414 assist in making a definitive diagnosis.<sup>457</sup>

415 Several treatment options are available to alleviate symptoms and maintain optimal liver  
416 function for inherited liver disease. Dietary modifications may be necessary, such as adhering  
417 to a low-copper diet in cases of Wilson's disease, and avoiding foods rich in copper like animal  
418 organs, dried fruits, and mushrooms.<sup>458</sup> Symptomatic treatment often involves the use of  
419 medications that facilitate copper excretion or inhibit its absorption.<sup>459</sup> Additionally, patients  
420 with liver damage can benefit from appropriate hepatoprotective therapy. For those



421 experiencing neuropsychiatric symptoms, consultation with a neurologist is recommended for  
422 tailored management strategies. Itch relief can also be achieved through pharmacological  
423 interventions. In rare instances where hereditary liver diseases lead to ALF or decompensated  
424 cirrhosis unresponsive to conventional treatments or intolerant reactions occur, consideration  
425 should be given to liver transplantation.<sup>460</sup> Detailed information of Wilson disease  
426 managements can be found in updated AASLD and EASL clinical practice guidelines.<sup>100,461</sup>

427

#### 428 Liver cirrhosis

429 The diagnosis of liver cirrhosis should be comprehensive, taking into account clinical  
430 manifestations of hepatic hypofunction and portal hypertension, as well as imaging and  
431 endoscopy findings, and laboratory results. Liver biopsy is recommended for patients with  
432 diagnostic difficulties, while etiological screening should be conducted whenever possible.<sup>462</sup>

433 Typical features observed in abdominal ultrasound, CT scans, and MRI images of cirrhosis  
434 include changes in liver volume (early enlargement followed by late contraction), abnormal  
435 ratio between the left and right lobes (shrinkage of the right lobe with enlargement of the left  
436 lobe and caudate lobe), irregular or jagged liver contour, widening of liver clefts, uneven liver  
437 echo or density signal distribution, dilation of the portal vein, and collateral circulation  
438 expansion.<sup>155</sup> Transient elastography-derived liver stiffness measurement (LSM) demonstrates

439 a strong ability to evaluate significant liver fibrosis and cirrhosis but exhibits poor accuracy in  
440 assessing mild stages of fibrosis. Magnetic resonance elastography (MRE) offers high  
441 diagnostic accuracy along with good stability and efficiency for staging liver fibrosis because  
442 it is less influenced by factors such as obesity or ascites; however, it requires relatively more

443 time for examination and is expensive.<sup>463</sup> Serological indicators such as aspartate  
444 aminotransferase-platelet ratio index (APRI) and fibrosis-4 index (FIB-4) exhibit low  
445 sensitivity and specificity in diagnosing cirrhosis. Moreover, the critical value used to  
446 determine liver fibrosis/cirrhosis can also be affected by etiology among other factors.<sup>464</sup>

447 According to the presence of esophageal and gastric varices, hemorrhage, ascites, hepatic  
448 encephalopathy, and jaundice, cirrhosis is classified into six stages. Stage 1 does not exhibit  
449 varicose veins or any other complications; it is further divided into stages 1a and 1b based on  
450 whether the hepatic venous pressure gradient (HVPG) is  $\geq 10$  mmHg. Varicose veins appear in

stage 2 but without EGVB (esophagogastric variceal bleeding) or ascites. EGVB occurs in stage 3 but without decompensation such as ascites or hepatic encephalopathy. Stage 4 includes various forms of decompensation except for EGVB, including ascites, overt hepatic encephalopathy, overt bacterial infection, and non-obstructive jaundice. Stage 5 presents two types of decompensations while stage 6 is characterized by recurrent infection, dysfunction of extrahepatic organs, ACLF, refractory ascites, persistent hepatic encephalopathy or jaundice.<sup>462,465</sup>

The most crucial treatment for cirrhosis is the removal of its underlying cause. Etiological control, particularly antiviral therapy in patients with hepatitis B/C, as well as abstinence in those with alcoholic cirrhosis, can potentially reverse liver fibrosis and cirrhosis or restore compensatory stage in decompensated cirrhosis patients.<sup>466</sup> In cases where malnutrition complicates cirrhosis, it is recommended to consume 25-35 kcal/kg/d energy intake, 1.0-1.5 g/kg/d protein intake, increase meal frequency, add extra meals at night, and adequately supplement dietary fiber, vitamins, and trace elements. Patients with ascitic cirrhosis should moderately restrict sodium intake (85-120 mmol/d or equivalent to 5.0-6.9 g/d salt) while avoiding extreme sodium restriction (<40 mmol/d). Unless moderate to severe dilutive hyponatremia (blood sodium <125 mmol/L) is present, water intake does not generally need to be restricted in patients with ascites due to cirrhosis.<sup>467,468</sup> Diuretics are considered the first-line treatment for ascites in cirrhotic patients; spironolactone alone or combined with furosemide or torasemide can be used. Grade 2 or 3 ascites that are unresponsive to conventional diuretics may be managed with the administration of tolvaptan.<sup>469</sup> Massive paracentesis is a commonly employed intervention for refractory ascites, and albumin infusion should be utilized to optimize intravascular volume expansion. Teripressin represents an efficacious pharmacological option for the treatment of refractory ascites.<sup>470</sup> Transjugular intrahepatic portosystemic shunt (TIPS) should be considered in cases where therapy for massive ascites proves ineffective.<sup>471</sup> Liver transplantation serves as the definitive therapeutic approach for decompensated cirrhosis and warrants evaluation when patients develop esophageal variceal bleeding, refractory ascites, hepatorenal syndrome, hepato-pulmonary syndrome, recurrent hepatic encephalopathy, ACLF, or HCC.<sup>472</sup> Detailed information of cirrhosis managements can be found in updated AASLD and EASL clinical practice guidelines.<sup>462,473-476</sup>

481

482 HCC

483 Traditionally, the diagnosis of HCC has been primarily based on cytology or histology.

484 However, with advancements in staged perfusion angiography during CT and MRI cross-

485 sectional imaging, HCC can now be reliably diagnosed radiologically in cirrhotic patients under

486 surveillance without the need for biopsy.<sup>477</sup> Abdominal ultrasound is currently considered the

487 most recommended method for monitoring HCC.<sup>477,478</sup> Although serum alpha-fetoprotein (AFP)

488 alone lacks sensitivity and specificity to serve as an independent monitoring test, its

489 combination with ultrasound significantly improves early detection sensitivity for HCC.<sup>479</sup>

490 Various integrated imaging and blood-based strategies have been proposed to enhance early

491 detection of HCC; nevertheless, most of these approaches have only been evaluated through

492 case-control studies and require prospective validation.<sup>480</sup>

493 <sup>16</sup> Over the past two decades, the Barcelona Clinic Liver Cancer (BCLC) staging system has  
494 gained recognition from the majority of professional societies.<sup>481</sup> However, managing HCC

495 involves a complex decision-making process, and the availability of treatment options varies

496 significantly among medical centers across different countries. Consequently, effective HCC

497 management necessitates multidisciplinary collaboration to devise tailored strategies that cater

498 to each patient's unique circumstances in order to achieve optimal outcomes.<sup>482</sup> Surgical

499 treatment <sup>29</sup> options for hepatocellular carcinoma include surgical resection and liver

500 transplantation, both considered potentially curative treatments. <sup>27</sup> However, it is important to

501 note that nearly 70% of patients experience recurrent HCC after resection.<sup>483</sup> Liver

502 transplantation stands out as <sup>11</sup> the most definitive treatment option for early-stage hepatocellular

503 carcinoma since it allows removal not only of the tumor but also an unhealthy liver with limited

504 functional capacity. A retrospective multicenter study involving 187 HCC patients revealed that

505 58% underwent successful downstaging followed by liver transplantation with <sup>3</sup> a 5-year survival

506 rate reaching 80%.<sup>484</sup> Percutaneous local ablation is a potentially curative treatment modality

507 that can be employed in patients with early HCC. The two most commonly utilized techniques

508 are <sup>3</sup> radiofrequency ablation (RFA) and microwave ablation (MWA).<sup>485</sup> MWA demonstrates

509 enhanced efficacy for larger tumors measuring 3-4 cm, and requires less procedural time

510 compared to RFA. <sup>6</sup> <sup>486</sup> Transarterial chemoembolization (TACE) is a highly effective treatment

511 modality for patients with intermediate-stage HCC. Transarterial radiation embolization (TARE)  
512 represents an alternative local regional therapy approach, which can be employed as the primary  
513 therapeutic intervention for unresectable HCC cases.<sup>487</sup> Unlike TACE, TARE involves  
514 intratumoral brachytherapy techniques and exerts minimal embolic effects on hepatic artery  
515 distribution, making it suitable even for patients presenting portal vein thrombosis or tumor  
516 invasion (Fig. 8).<sup>488</sup>

517 The treatment strategy for HCC has been significantly revolutionized by the introduction of  
518 systemic pharmacological therapy worldwide.<sup>489</sup> Sorafenib, lenvatinib, cabotinib, ramocicumab,  
519 and other drugs have successively gained approval for HCC treatment.<sup>490-492</sup> However, due to  
520 the heterogeneity and complexity of HCC pathogenesis, precise treatment for this disease is  
521 still under investigation. Concurrently, immune checkpoint inhibitors have emerged as a  
522 promising therapeutic option for advanced hepatocellular carcinoma.<sup>493</sup> Various  
523 immunotherapies including checkpoint inhibitor combined targeted therapy, checkpoint  
524 inhibitor combination therapy, and non-checkpoint inhibitor immunotherapy (such as immune  
525 cell adoptive therapy) have shown significant efficacy.<sup>494,495</sup> In conclusion, active research is  
526 still required in this field and a combination of treatment modalities may enhance therapeutic  
527 options for patients. Detailed information of HCC managements can be found in updated  
528 AASLD and EASL clinical practice guidelines.<sup>482,496</sup>

529

### 530 **Clinical research progress**

#### 531 **Acute liver disease-viral hepatitis**

532 Acute viral hepatitis, resulting from viruses such as HAV-HEV, primarily benefits from  
533 prevention via inactivated vaccines.<sup>497</sup> Currently, there is no specific antiviral for HAV, but  
534 clinical studies suggest benefits from steroids and interferon- $\beta$  in improving outcomes.<sup>498</sup> For  
535 severe acute HBV, early administration of lamivudine and entecavir has been shown to improve  
536 patient conditions and reduce progression to chronic hepatitis.<sup>499,500</sup> Therapeutic strategies such  
537 as ledipasvir/sofosbuvir have been effective in treating HIV and HBV co-infections by  
538 shortening treatment durations.<sup>501</sup> Meanwhile, grazoprevir combined with elbasvir shows  
539 promise in acute HCV, particularly for genotypes 1 or 4.<sup>502</sup> For HEV, ribavirin has been effective  
540 in reducing viral load (Table 3).<sup>503</sup> Research on treatment for acute HDV is limited and warrants

541 further exploration. Additional studies reveal that other virus like adenovirus, cytomegalovirus  
542 (CMV), Epstein-Barr virus (EBV), and TT virus can also cause acute viral hepatitis.<sup>504,505</sup> Rare  
543 viral hepatitis are often overlooked due to their low incidence. These less common forms  
544 underline the need for heightened clinical awareness to prevent misdiagnosis and inappropriate  
545 treatment.

546

#### 547 Acute liver disease-DILI

548 Acute DILI, often caused by substances such as acetaminophen, antibiotics, or anti-  
549 inflammatory drugs, usually resolves with decreasing liver enzyme levels within days to weeks,  
550 with fewer than 10% of cases progressing to chronic liver damage.<sup>506</sup> Acetaminophen overdose  
551 is primarily treated with N-acetylcysteine (NAC).<sup>507</sup> Investigating additional treatments that  
552 can protect liver function during both the early and late stages of DILI is critical for minimizing  
553 long-term damage.

554

#### 555 Acute liver disease-ALD

556 Acute ALD remains challenging, and therapies such as pentoxifylline and corticosteroids  
557 shown to decrease short-term, but not medium-term, mortality.<sup>508</sup> Although corticosteroids may  
558 reduce short-term mortality, their long-term safety profile is concerning due to the risk of severe  
559 infections.<sup>509</sup> TNF- $\alpha$  inhibitors, such as infliximab and etanercept, reduce inflammation but  
560 increase infection risks.<sup>510</sup> There is emerging interest in the role of intestinal microbes in ALD,  
561 though clinical validations are still preliminary.<sup>511</sup>

562

#### 563 Chronic liver disease-viral hepatitis

564 Innovations in CHB treatments include Vebicorvir (VBR), a core inhibitor that has shown  
565 superior efficacy compared to traditional nucleoside reverse transcriptase inhibitors.<sup>512</sup>  
566 Tenofovir alafenamide is used for multidrug-resistant HBV strains, improving long-term  
567 outcomes.<sup>513</sup> PD-1 inhibitors and RNA interference therapies like ARC-520 are under  
568 investigation for their potential to enhance immune responses and reduce viral load in HBV  
569 patients.<sup>514,515</sup> Treatments for chronic HCV have evolved with the development of DAAs,  
570 reducing concerns about VZV reactivation.<sup>516</sup> Glecaprevir and pibrentasvir have shown



571 improved responses in HCV patients who failed prior DAA therapies.<sup>517</sup> Bulevirtide combined  
572 with tenofovir disoproxil fumarate offers new hope for HDV patients, although more studies  
573 are needed to confirm these findings.<sup>518,519</sup> Overall, these advancements represent significant  
574 progress in the treatment of liver diseases,<sup>15</sup> but ongoing research is crucial to optimize safety  
575 and long-term efficacy of these therapies.

576

#### 577 Chronic liver disease-ALD

578 No FDA-approved medications currently exist specifically for ALD. Research indicates that  
579 alcohol consumption disrupts the intestinal microbiota, sometimes leading to an overgrowth of  
580 *Candida albicans*. This alteration suggests that probiotics could help mitigate ALD by  
581 modulating intestinal flora.<sup>520,521</sup> Inflammation is a critical factor in ALD pathogenesis, hence  
582 steroids are used to manage symptoms and improve short-term survival rates, although their  
583 long-term efficacy is still not well-established.<sup>522</sup> Corticosteroids treatments seem to be  
584 effective, which needs adequate nutritional intake throughout the treating duration.<sup>523</sup> Efforts to  
585 target inflammation with cytokines such as IL-1 and TNF- $\alpha$  have been explored, but results,  
586 including attempts to combine IL-1 receptor antagonists with pentoxifylline and zinc, have not  
587 shown superior outcomes compared to corticosteroids alone.<sup>524,525</sup> Future research is essential  
588 to develop more targeted therapies for ALD.

589

#### 590 Chronic liver disease-MASLD

591 With rising global obesity rates, MASLD prevalence is expected to increase.<sup>526</sup> In a significant  
592 development, in 2020, saroglitazar was approved by India's Drug Administration as the first  
593 medication specifically for MASLD, demonstrating effectiveness in reducing ALT levels, liver  
594 fat content, insulin resistance, and atherogenic dyslipidemia.<sup>527</sup> Furthermore, in March 2024,  
595 Resmetirom became the first FDA-approved drug for treating non-cirrhotic NASH with  
596 moderate to advanced liver fibrosis in adults, marking a major milestone in MASLD  
597 treatment.<sup>528</sup> Despite these advancements, there remains a substantial need for more precise  
598 non-invasive diagnostic techniques and effective treatments.

599

#### 600 Chronic liver disease-autoimmune liver diseases

601 Recent advances in AIH research have improved our understanding of its causes, diagnosis, and  
602 treatment. Glucocorticoids and immunosuppressants remain treatment mainstays,<sup>529</sup> with  
603 studies showing that combining mycophenolate mofetil (MMF) with prednisolone can lead to  
604 better outcomes and fewer side effects.<sup>530</sup> Future directions include advancing personalized  
605 treatment strategies to enhance patient quality of life and prognosis. Cholestatic liver diseases  
606 such as PBC and PSC are primarily managed with ursodeoxycholic acid (UDCA).<sup>531</sup> Emerging  
607 treatments, such as obeticholic acid, are undergoing evaluation for their efficacy in these  
608 diseases.<sup>532</sup> For PSC, liver transplantation remains a definitive but severe option, underscoring  
609 the ongoing need for research into pharmacological interventions that could slow disease  
610 progression.

611

#### 612 End-stage liver disease-cirrhosis

613 As a critical aspect of end-stage liver disease, cirrhosis has undergone significant advancements  
614 in both diagnosis and management. The integration of non-invasive tests like transient  
615 elastography and serum biomarkers (e.g., FibroTest) into clinical practice has greatly improved  
616 the early detection of liver fibrosis and cirrhosis, reducing reliance on invasive biopsy  
617 procedures.<sup>533</sup> Recent studies have highlighted the potential of pegbelfermin and aldafermin in  
618 ameliorating liver fibrosis associated with MASH and compensated cirrhosis.<sup>534,535</sup> Additionally,  
619 anti-fibrotic medications and treatments aimed at enhancing liver microcirculation are showing  
620 promising results in clinical trials. Research into the therapeutic application of mesenchymal  
621 stem cells for decompensated cirrhosis has also yielded positive outcomes, although more  
622 extensive studies are required to confirm these findings.<sup>536,537</sup> Liver transplantation continues  
623 to be the sole curative treatment for cirrhosis, underscoring the ongoing need for the  
624 development of more effective therapies.

625

#### 626 End-stage liver disease-liver failure

627 Liver failure represents the most severe manifestation of end-stage liver disease, where  
628 managing both acute and chronic forms remains a formidable challenge. Recent advancements  
629 include the development of the MKK4 inhibitor HRX215, which has been shown to promote  
630 liver regeneration and prevent liver failure.<sup>538</sup> Extracorporeal liver support devices have also



shown promise in improving patient outcomes in acute and chronic liver failure, potentially reducing mortality rates.<sup>539</sup> Innovations in regenerative medicine, including stem cell therapies and liver bioengineering, are being explored as novel treatment avenues.<sup>540</sup> Moreover, improvements in liver transplantation techniques and refinement of immunosuppressive treatments are crucial for enhancing patient survival and quality of life.

## 2 End-stage liver disease-HCC

There has been notable progress in clinical research on HCC, yielding several pioneering treatments. Research comparing PD-1 antibody carrelizumab with VEGFR2-targeted TKI rivoceranib has indicated better progression-free and overall survival rates in patients with unresectable HCC compared to standard treatments like sorafenib.<sup>541</sup> In high-risk post-resection HCC, the PD-1 inhibitor sintilimab shows potential in reducing tumor recurrence.<sup>542</sup> The LAUNCH trial revealed that combining lenvatinib with transarterial chemoembolization (TACE) significantly enhances clinical outcomes in patients with advanced HCC.<sup>543</sup> Furthermore, a phase 1/2 trial exploring a personalized neoantigen vaccine (PTCV) combined with pembrolizumab has demonstrated promising immune responses and preliminary efficacy in advanced HCC cases.<sup>544</sup> For patients at high risk of HCC recurrence after postoperative ablation, atezolizumab combined with bevacizumab improves recurrence-free survival.<sup>545</sup> These emerging therapies offer new hopes and strategies in the fight against HCC, potentially transforming the therapeutic landscape.

## Conclusions and perspectives

The etiology of liver diseases is continually evolving. With the global rise in obesity and T2DM, MASLD poses a growing health threat worldwide. The administration of vaccination and antiviral medications has significantly decreased the incidence of viral hepatitis in the Americas and Europe; however, the prevalence of MASLD, ALD, and DILI is rising. Despite advancements in vaccinations and antiviral medications that effectively prevent and combat viral infections, chronic hepatitis B and C remain prevalent, particularly in low-income countries lacking adequate medical resources. Additionally, the incidence of ALD is increasing, especially among younger populations. Despite heightened public health efforts, liver diseases

661 significantly contribute to the global disease burden.<sup>546</sup>

662 The diagnosis of liver diseases primarily depends on liver biopsy, an invasive technique  
663 unsuitable for broad screening. The absence of reliable biomarkers <sup>7</sup> for the precise diagnosis  
664 and staging of specific liver diseases poses a significant challenge.<sup>547</sup> As such, developing novel  
665 non-invasive biomarkers and methods is crucial for the early detection of asymptomatic liver  
666 diseases. Such advancements could help identify high-risk individuals sooner, allowing for  
667 early interventions to halt disease progression.

668 Although there has been notable progress in understanding liver disease pathogenesis  
669 through advanced technologies, therapeutic options approved by the FDA remain limited, and  
670 existing medical interventions often provide minimal long-term survival benefits. The  
671 complexity of liver disease pathophysiology and the substantial heterogeneity in disease  
672 phenotypes mean that current mouse models do not adequately mimic the full spectrum of  
673 human liver diseases, including ALD and MASLD. Significant disparities exist between mouse  
674 models and human conditions in terms of pathophysiology and treatment outcomes, as  
675 numerous clinical trials have shown that drugs effective in mouse models fail to offer clinical  
676 benefits in humans.<sup>548</sup> The properties of chemical absorption, distribution, metabolism,  
677 excretion, and toxicity differ between species, resulting in drug doses that are beneficial and  
678 non-toxic in mice showing insufficient efficacy or causing side effects in humans. For example,  
679 galectin-3, which was demonstrated to reduce liver inflammation and fibrosis in murine MASH  
680 models, did not translate effectively to human patients.<sup>549</sup> Belapectin, a galectin-3 inhibitor,  
681 failed to show efficacy in MASH <sup>28</sup> patients with cirrhosis and portal hypertension in a phase 2b  
682 randomized trial, possibly due to inadequate treatment duration and dosage. Pharmacokinetic  
683 analysis revealed differences in the metabolism of Belapectin between mice and humans.<sup>550</sup>  
684 This discrepancy underscores the need for the development of more standardized mammalian  
685 models, such as pigs and chimpanzees, which might bridge these gaps and improve translational  
686 success.

687 Moving forward, our current understanding of the pathogenesis has provided valuable  
688 insights and directed ongoing research efforts aimed at liver disease treatment. However, a  
689 comprehensive understanding of critical signaling pathways and their interactions during liver  
690 disease progression is essential to advance therapeutic strategies and improve patient outcomes.

7%

SIMILARITY INDEX

PRIMARY SOURCES

|   |                                                                                                                                                                                                                                                         |                 |
|---|---------------------------------------------------------------------------------------------------------------------------------------------------------------------------------------------------------------------------------------------------------|-----------------|
| 1 | <a href="#">jamanetwork.com</a><br>Internet                                                                                                                                                                                                             | 94 words — 1%   |
| 2 | <a href="#">www.science.gov</a><br>Internet                                                                                                                                                                                                             | 49 words — 1%   |
| 3 | <a href="#">Carlos López López, Mariona Calvo, Juan Carlos Cámara, Beatriz García-Paredes et al. "SEOM-GEMCAD-TTD clinical guidelines for the management of hepatocarcinoma patients (2023)", Clinical and Translational Oncology, 2024</a><br>Crossref | 32 words — < 1% |
| 4 | <a href="#">www.mdpi.com</a><br>Internet                                                                                                                                                                                                                | 30 words — < 1% |
| 5 | <a href="#">Naim Alkhouri, Stephen A. Harrison. "Need-to-Know NAFLD - The Complete Guide to Nonalcoholic Fatty Liver Disease", CRC Press, 2023</a><br>Publications                                                                                      | 29 words — < 1% |
| 6 | <a href="#">saudijgastro.com</a><br>Internet                                                                                                                                                                                                            | 24 words — < 1% |
| 7 | <a href="#">www.easl.eu</a><br>Internet                                                                                                                                                                                                                 | 24 words — < 1% |

---

8 Mengyao Yan, Shuli Man, Benyue Sun, Long Ma, Lanping Guo, Luqi Huang, Wenyan Gao. "Gut liver brain axis in diseases: the implications for therapeutic interventions", Signal Transduction and Targeted Therapy, 2023

Crossref

---

9 Amani Elshaer, David M. H. Chascsa, Blanca C. Lizaola-Mayo. "Exploring Varied Treatment Strategies for Metabolic Dysfunction-Associated Steatotic Liver Disease (MASLD)", Life, 2024

Crossref

---

10 George A. Bray. "Handbook of Obesity -- Volume 1 - Epidemiology, Etiology, and Physiopathology, Third Edition", CRC Press, 2019

Publications

---

11 worldwidescience.org

Internet

---

12 www.f6publishing.com

Internet

---

13 Lu Wang, Xiaoqing Zeng, Zida Wang, Ling Fang, Jia Liu. "Recent advances in understanding T cell activation and exhaustion during HBV infection", Virologica Sinica, 2023

Crossref

---

14 Zhou, Zhou, Ming-Jiang Xu, and Bin Gao. "Hepatocytes: a key cell type for innate immunity", Cellular and Molecular Immunology, 2015.

Crossref

---

15 "Clinical Dilemmas in Viral Liver Disease", Wiley, 2010

Crossref

---

|    |                                                                                                                                                                                                                          |                 |
|----|--------------------------------------------------------------------------------------------------------------------------------------------------------------------------------------------------------------------------|-----------------|
| 16 | <a href="http://www.jctres.com">www.jctres.com</a><br>Internet                                                                                                                                                           | 13 words — < 1% |
| 17 | <a href="http://www.dvm360.com">www.dvm360.com</a><br>Internet                                                                                                                                                           | 12 words — < 1% |
| 18 | <a href="http://www.fastercapital.com">www.fastercapital.com</a><br>Internet                                                                                                                                             | 12 words — < 1% |
| 19 | <a href="http://www.stabroeknews.com">www.stabroeknews.com</a><br>Internet                                                                                                                                               | 12 words — < 1% |
| 20 | Mi Na Kim, Ji Won Han, Jihyun An, Beom Kyung Kim et al. "KASL Clinical Practice Guidelines for Noninvasive Tests to Assess Liver Fibrosis in Chronic Liver Disease", Clinical and Molecular Hepatology, 2024<br>Crossref | 11 words — < 1% |
| 21 | <a href="http://insights.omnia-health.com">insights.omnia-health.com</a><br>Internet                                                                                                                                     | 11 words — < 1% |
| 22 | Ann Richmond, Raymond Kaempfer. "Cytokines revisited at Hilton Head", Cytokine & Growth Factor Reviews, 2000<br>Crossref                                                                                                 | 10 words — < 1% |
| 23 | Carolyn D. Berdanier. "Handbook of Nutrition and Food", CRC Press, 2019<br>Publications                                                                                                                                  | 10 words — < 1% |
| 24 | Roberto Candia, Blanca Norero, Carlos Agüero, Luis Díaz et al. "Validation of the Simplified Criteria for the Diagnosis of Autoimmune Hepatitis in Chilean-Hispanic Patients", Annals of Hepatology, 2017<br>Crossref    | 10 words — < 1% |
| 25 | <a href="http://xiahepublishing.com">xiahepublishing.com</a><br>Internet                                                                                                                                                 |                 |

10 words — < 1%

26 AB Pant. "Chapter 98 Allergic Rhinitis", Springer Science and Business Media LLC, 2024

Crossref

9 words — < 1%

27 F Durand. "Wilson's disease with severe hepatic insufficiency: beneficial effects of early administration of D-penicillamine", Gut, 2001

Crossref

9 words — < 1%

28 [cris.maastrichtuniversity.nl](https://cris.maastrichtuniversity.nl)

Internet

9 words — < 1%

29 [sciendo.com](https://sciendo.com)

Internet

9 words — < 1%

30 [www.frontiersin.org](https://www.frontiersin.org)

Internet

9 words — < 1%

31 Mary T. Keogan, Eleanor M. Wallace, Paula O'Leary. "Concise Clinical Immunology for Healthcare Professionals", Routledge, 2006

Publications

8 words — < 1%

32 Min De ZENG. "Guidelines for the diagnosis and treatment of alcoholic liver disease", Journal of Digestive Diseases, 5/2008

Crossref

8 words — < 1%

33 Philip, George. "Liver Transplant Wait-List Trends in Young American Adults", Queen's University (Canada), 2021

ProQuest

8 words — < 1%

34 [bmcpediatr.biomedcentral.com](https://bmcpediatr.biomedcentral.com)

Internet

8 words — < 1%

---

35

Ashwani K. Singal, Philippe Mathurin. "Diagnosis and Treatment of Alcohol-Associated Liver Disease", JAMA, 2021

Crossref

7 words — < 1%

---

36

Niederau, Claus. "Chronic hepatitis B in 2014: Great therapeutic progress, large diagnostic deficit", World Journal of Gastroenterology, 2014.

Crossref

7 words — < 1%

---

EXCLUDE QUOTES      OFF  
EXCLUDE BIBLIOGRAPHY   ON

EXCLUDE SOURCES      OFF  
EXCLUDE MATCHES      OFF
